# Supplementary material for: USP14 Inhibition Regulates Tumorigenesis by Inducing Autophagy in Lung Cancer In Vitro
Source: PubMed Central journal article supplement (PMC6862215; doi:10.3390/ijms20215300), 2019-10-24
Supplement: ijms-20-05300-s001.pdf [file ijms-20-05300-s001.pdf]

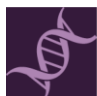

Supplementary materials:

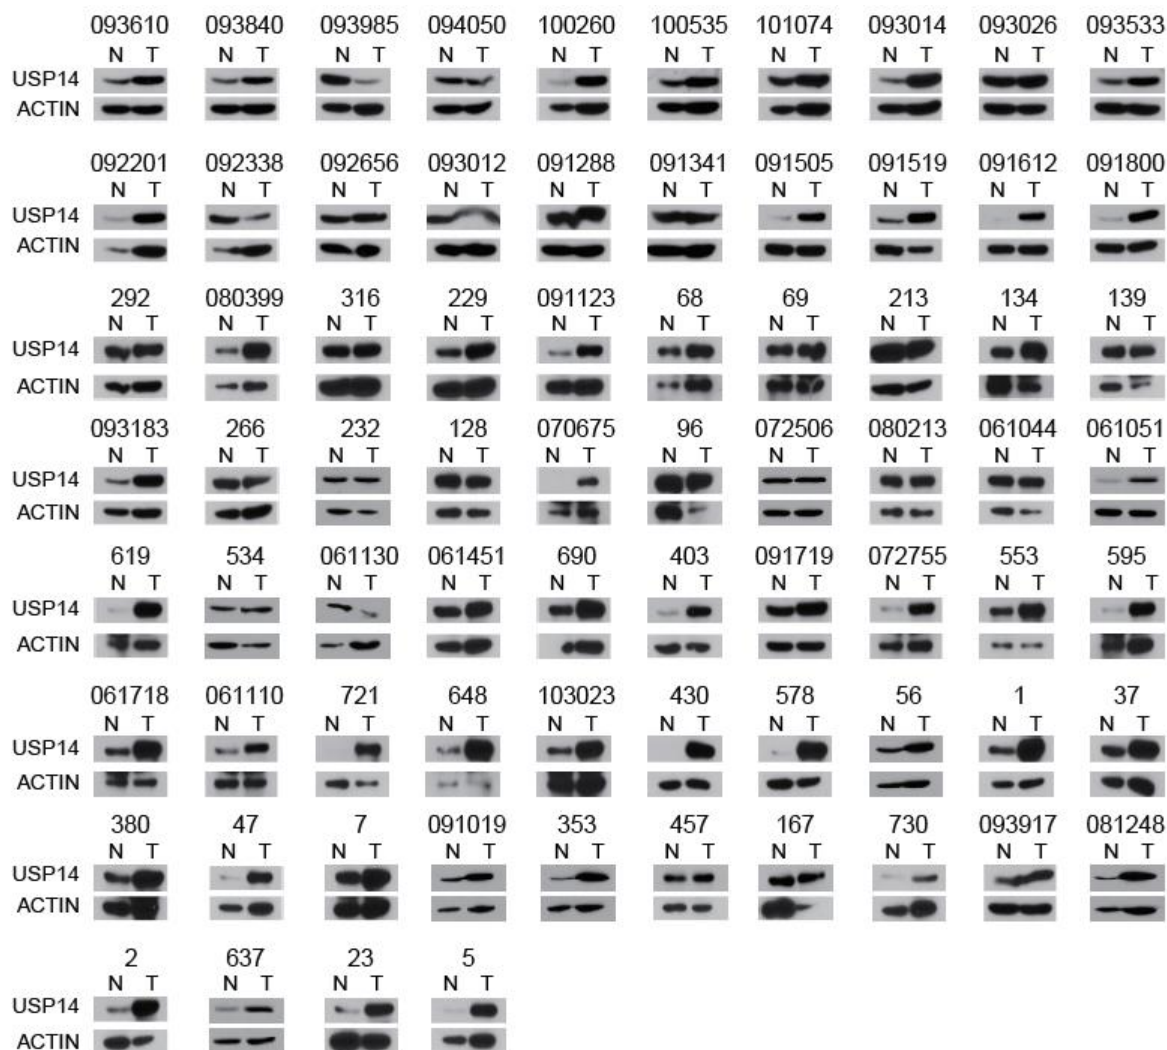

**Figure S1.** USP14 protein levels in 74 paired lung cancer tissues and non-tumor tissues. (N = normal lung tissue, T = lung cancer tissue).

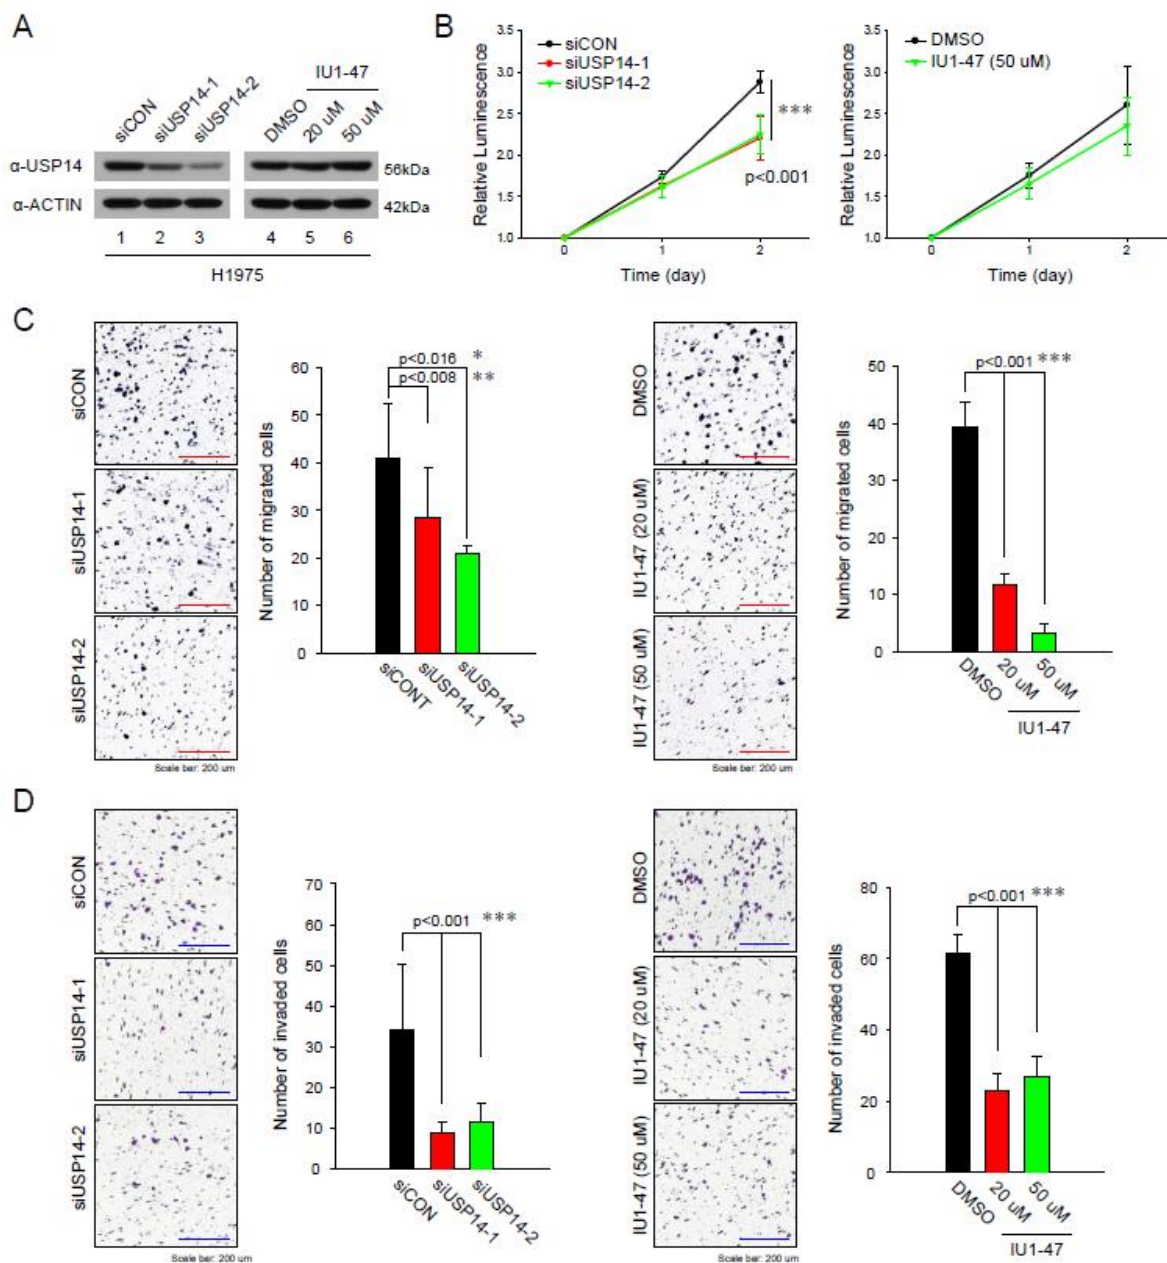

**Figure S2.** USP14 inhibition using siRNA and IU1-47 in H1975 lung cancer cells. (A) Immunoblot analysis for USP14 using siRNA and IU1-47 in H1975 cells. (B) Effects of USP14 knockdown or inhibition on the cell viability of H1975 ( $n = 5$ ). Effects of USP14 knockdown or inhibition on cell migration (C) or invasion (D). Values are the mean  $\pm$  SD of the number of invaded cells ( $n = 5$ ). Scale bar = 200  $\mu$ m.

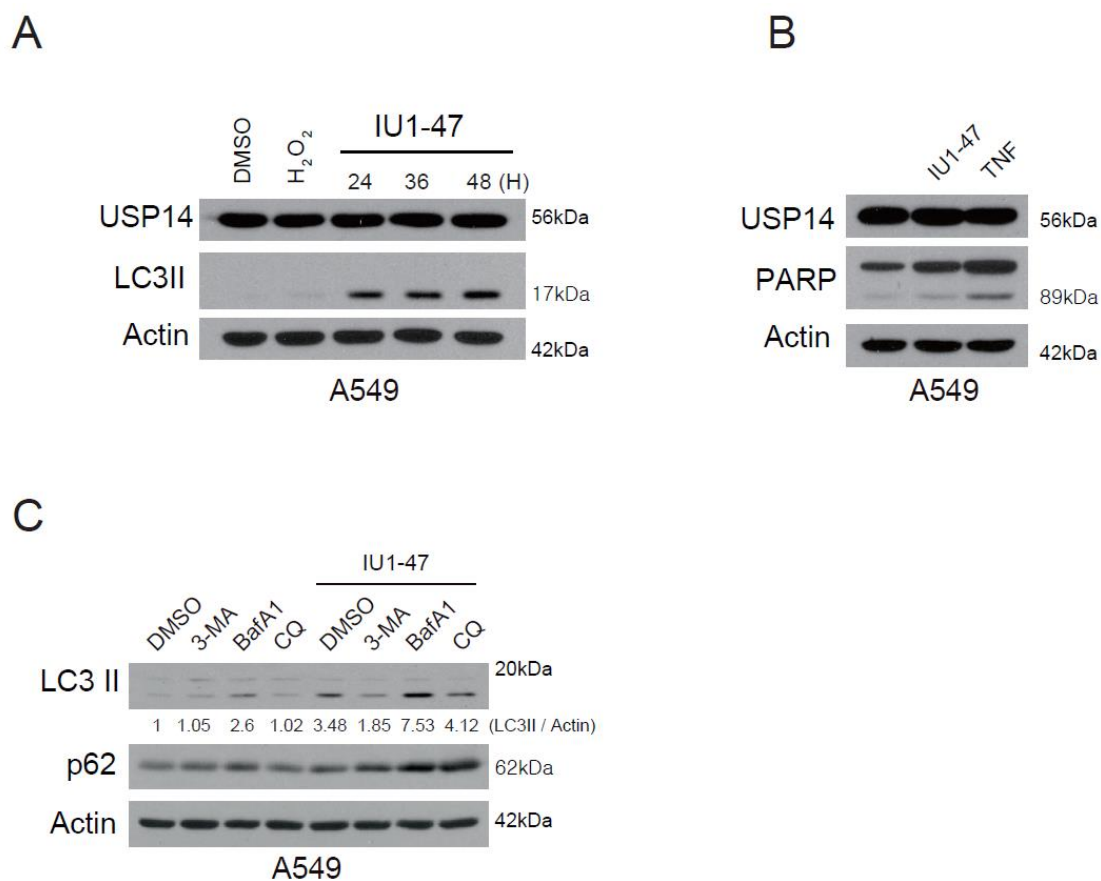

**Figure S3.** USP14 inhibition induces LC3 autophagy protein. (A–B) A549 cells were treated with TNF, H<sub>2</sub>O<sub>2</sub> or USP14 inhibitor (IU1-47) and lysed and immunoblotted with anti-USP14, autophagy proteins (LC3 I, II), apoptotic cell death associated protein (PARP) and  $\beta$ -actin antibodies. (C) A549 cells were treated with DMSO, 3-Methyladenine (3-MA), Bafilomycin A1 (BafA1), chloroquine (CQ) or USP14 inhibitor (IU1-47) and lysed and immunoblotted with anti-autophagy proteins (LC3 I, II), p62 and  $\beta$ -actin antibodies.
